# Supplementary material for: Wild Animals Are Reservoirs and Sentinels of Staphylococcus aureus and MRSA Clones: A Problem with “One Health” Concern
Source: MDPI journal article supplement (doi:10.3390/antibiotics10121556), 2021-12-20
Supplement: s1 [file s1]

# Wild Animals Are Reservoirs and Sentinels of *Staphylococcus aureus* and MRSA Clones: A Problem with “One Health” Concern

Idris Nasir Abdullahi, Rosa Fernández-Fernández, Guillermo Juárez-Fernández, Sandra Martínez-Álvarez, Paula Eguizabal, Myriam Zarazaga, Carmen Lozano and Carmen Torres \*

Area of Biochemistry and Molecular Biology, One-Health Research Group, Universidad de La Rioja, 26006 Logroño, Spain; idris-nasir.abdullahi@unirioja.es (I.N.A.); rosa.fernandez.1995@gmail.com (R.F.-F.); gukle.juarez@gmail.com (G.J.-F.); sandra.martinezal@unirioja.es (S.M.-Á.); paulaeguimar@gmail.com (P.E.); myriam.zarazaga@unirioja.es (M.Z.); carmen.lozano@unirioja.es (C.L.)

\* Correspondence: carmen.torres@unirioja.es

## Supplementary Materials

**Table S1.** Study characteristics, antimicrobial resistance, and virulence genes of *Staphylococcal aureus* NTO carriages in wild animals.

| Reference                                                | Animal Species (Description) | Country  | Number of Animals tested | No. of <i>S. aureus</i> positive animals (%) | Total number of MRSA positives in animals (%) | Laboratory detection methods | Antimicrobial resistance phenotypes (Aside from MRSA) | AMR genes                    | Virulence genes detected |
|----------------------------------------------------------|------------------------------|----------|--------------------------|----------------------------------------------|-----------------------------------------------|------------------------------|-------------------------------------------------------|------------------------------|--------------------------|
| <b>Wild Mammals (WM, excluding NHP and wild rodents)</b> |                              |          |                          |                                              |                                               |                              |                                                       |                              |                          |
| [5] <sup>a</sup>                                         | Wild mammals                 | Spain    | 1120                     | 188 (16.7)                                   | 0 (0.0)                                       | C/P/M                        | PEN, SXT, TET, STR                                    | NT                           | NT                       |
| [18]                                                     | Wild boars                   | Portugal | 45                       | 15 (33.3)                                    | 1 (8.9)                                       | C/P/M                        | TET, PEN, CLI, GEN, CIP, LZD                          | <i>aac(6′)-Ie-aph(2″)-Ia</i> | IEC type B               |
| [19]                                                     | Red deer                     | Spain    | 65                       | 16 (24.6)                                    | 11 (16.9)                                     | C/P/M                        | PEN                                                   | <i>blaZ</i>                  | IEC type E, <i>etd2</i>  |

|                   |                                       |                         |      |           |           |       |                              |                                                          |                                               |
|-------------------|---------------------------------------|-------------------------|------|-----------|-----------|-------|------------------------------|----------------------------------------------------------|-----------------------------------------------|
| [20]              | Wild Boars                            | Germany                 | 114  | 8 (7.0)   | 0 (0.0)   | C/P/M | Fosfomycin-susceptible       | <i>fosB</i>                                              | ND                                            |
| [21] <sup>a</sup> | Wild mammals (red deer, Iberian ibex) | Spain                   | 2506 | NR        | 4 (0.01)  | C/P/M | TET, CIP, ERY, CLI           | NT                                                       | NT                                            |
| [23]              | Wild mammals                          | Spain                   | 103  | 23 (22.3) | 4 (3.9)   | C/P/M | PEN, FOX, ERI, CLI, STR      | <i>mecA, mecC, blaZ, erm(C), aph(3')-IIIa, ant(6)-Ia</i> | <i>seh, seg, sei, sem, sen, seo, seu, tst</i> |
| [25]              | Wild Boar                             | Spain                   | 371  | 51 (13.7) | 1 (0.3)   | C/P/M | PEN, STR, TET                | <i>blaZ, tet(M), tet(K), str</i>                         | <i>luk-D, luke</i>                            |
| [26]              | Wild rabbit                           | Spain                   | 59   | 17 (28.8) | NT        | C/P/M | NT                           | NT                                                       | NT                                            |
| [27]              | Wild mammals                          | Spain                   | 103  | 23 (22.3) | 3 (2.9)   | C     | PEN, MUP, CLI, STR, LZD, TET | NT                                                       | NT                                            |
| [28]              | Wild Boars                            | Germany                 | 577  | 0 (0.0)   | 0 (0.0)   | C/P/M | ND                           | ND                                                       | ND                                            |
| [29]              | Wild Lagomorphs                       | Spain                   | 369  | 70 (18.9) | 34 (9.4)  | C/P/M | PEN                          | <i>blaZ</i>                                              | ND                                            |
| [30]              | Wild Ungulates                        | Spain                   | 139  | 0 (0.0)   | 0 (0.0)   | C/P/M | ND                           | ND                                                       | ND                                            |
| [31]              | Wild mammals                          | Germany                 | 40   | 5 (12.5)  | 5 (12.5)  | C/P/M | PEN                          | <i>blaZ</i>                                              | ND                                            |
| [32]              | Wild rabbits                          | Portugal                | 77   | 4 (5.2)   | 0 (0.0)   | C/P/M | PEN                          | <i>blaZ</i>                                              | <i>hlB</i>                                    |
| [33]              | Wild boar                             | Germany                 | 111  | 41 (36.9) | 0 (0.0)   | C/P/M | AMP, PEN, ERY                | <i>blaZ</i>                                              | <i>she</i>                                    |
| [34]              | wild hedgehogs                        | Sweden                  | 55   | NR        | 35 (63.6) | C/P/M | PEN, GEN, CIP, ERY           | NT                                                       | NT                                            |
| [35]              | Bats                                  | Gabon and Cote d'Ivoire | 133  | 4 (3.0)   | 0 (0.0)   | C/P/M | ND                           | ND                                                       | <i>hla</i>                                    |
| [39] <sup>a</sup> | Shrews                                | China                   | 185  | 14 (7.6)  | 1 (0.5)   | C/P/M | PEN                          | <i>mecA</i>                                              | ND                                            |

| Non-Human Primates (NHP) |                     |                                                                 |     |            |                   |       |                         |                                                                           |                                                                                                                  |
|--------------------------|---------------------|-----------------------------------------------------------------|-----|------------|-------------------|-------|-------------------------|---------------------------------------------------------------------------|------------------------------------------------------------------------------------------------------------------|
| [41]                     | Wild primates       | Uganda                                                          | 15  | 15 (100.0) | 4 (28.6)<br>C/P/M |       | PEN, SXT, TET, RIF      | NT                                                                        | NT                                                                                                               |
| [42]                     | Wild Primates       | Côte d'Ivoire, Gabon, Democratic Republic of Congo, and Senegal | 132 | 15 (11.3)  | 0 (0.0)           | C/P/M | PEN, TET, SXT, ERY      | NT                                                                        | <i>lukS/F-PV, tst, sea, seb, eta, etb</i>                                                                        |
| [43]                     | Wild Apes           | Zambia and Uganda                                               | 62  | 36 (58.1)  | 0 (0.0)           | C/P/M | PEN, SXT, TET, ERY, CLI | NT                                                                        | <i>lukS/F-PV</i>                                                                                                 |
| [44]                     | Wild Monkeys        | Saint Kitts                                                     | 21  | 2 (9.5)    | 0 (0.0)           | C/P/M | ND                      | ND                                                                        | ND                                                                                                               |
| [45]                     | Wild apes and lemur | Madagascar                                                      | 19  | 7 (36.8)   | 0 (0.0)           | C/P/M | PEN                     | ND                                                                        | ND                                                                                                               |
| [46]                     | Wild Monkeys        | Gabon, Cote d' Ivoire                                           | 95  | 58 (61.1)  | 0 (0.0)           | C/P/M | PEN                     | <i>blaZ</i>                                                               | <i>lukS/F-PV</i>                                                                                                 |
| [47]                     | Rhesus macaques     | Nepal                                                           | 59  | 29 (49.2)  | 4 (6.8)           | C/P/M | ERY, CLI, LZD, TET, GEN | <i>aacC-aphD, erm(C), blaZ,</i><br>L22: [A29V] and L4: insertion [68KG69] | <i>sak, scn, tst, sec3, seo, sem, sei, sen, seg, ebpS, sdrE, cna, clfA, map, chp, lukS/F-PV, hlgA, hlgB, hld</i> |
| Wild Birds (WB)          |                     |                                                                 |     |            |                   |       |                         |                                                                           |                                                                                                                  |
| [5] <sup>a</sup>         | Wild vulture        | Spain                                                           | 40  | 2 (5.0)    | 0 (0.0)           | C/P/M | ND                      | NT                                                                        | NT                                                                                                               |
| [21] <sup>a</sup>        | Wild vulture        | Spain                                                           | 40  | NR         | 2 (0.01)          | C/P/M | TET, CIP, ERY, CLI      | NT                                                                        | NT                                                                                                               |
| [24]                     | Wild birds          | USA                                                             | 114 | 10 (8.8)   | 3 (2.6)           | C/P/M | TET, LEV, ERY, CLI      | NT                                                                        | NT                                                                                                               |
| [36]                     | Birds of prey       | Portugal                                                        | 16  | 1 (6.3)    | 0 (0.00)          | C/P/M | PEN, TET, CHL           | <i>blaZ</i>                                                               | ND                                                                                                               |

|                          |                                         |                                  |     |           |          |       |                                    |                                                     |                                               |
|--------------------------|-----------------------------------------|----------------------------------|-----|-----------|----------|-------|------------------------------------|-----------------------------------------------------|-----------------------------------------------|
| [37]                     | Storks                                  | Spain                            | 92  | 32 (34.8) | 3 (3.3)  | C/P/M | PEN, CIP, ERY,<br>CLI, CHL, STR    | <i>blaZ, erm(T), tet(M),<br/>str, fexA</i>          | <i>tst, can, eta, etd2</i>                    |
| [38]                     | Magpies<br>and<br>Cinereous<br>Vultures | Spain                            | 324 | 15 (4.6)  | 13 (4.0) | C/P/M | PEN, FOX, ERI,<br>CLI,<br>TET      | <i>blaZ, erm(C), vga(A),<br/>tet(K),<br/>tet(M)</i> | IEC type E                                    |
| <b>Wild Rodents (WR)</b> |                                         |                                  |     |           |          |       |                                    |                                                     |                                               |
| [12]                     | Free<br>living<br>wild rats             | Germany<br>and Czech<br>Republic | 145 | 37 (25.5) | 2 (13.8) | C/P/M | PEN                                | NT                                                  | <i>tst</i> , IEC type E                       |
| [17]                     | Wild<br>Rodents                         | Portugal                         | 204 | 38 (18.6) | 6 (2.9)  | C/P/M | PEN, CIP,<br>ERY, CLI, KAN,<br>GEN | <i>blaZ,<br/>aph(30)-IIIa,<br/>ermA</i>             | IEC Types A and E, <i>hlb</i> ,<br><i>hld</i> |
| [22]                     | Wild<br>rodents<br>and<br>shrews        | Germany,<br>Czech and<br>France  | 298 | 45 (15.1) | 1 (0.3)  | C/P/M | NR                                 | <i>blaZ, fosB, sdrM</i>                             | <i>Seg, egc, LukD, M</i> and <i>X</i>         |
| [39] <sup>a</sup>        | Rodents                                 | China                            | 212 | 87 (41.0) | 11 (5.2) | C/P/M | PEN, SXT, CIP,<br>TET, GEN         | NT                                                  | <i>lukS/F-PV</i> , IEC types A,<br>B, E, G    |
| [40]                     | Wild rats                               | Canada                           | 596 | NR        | 29 (4.9) | C     | NT                                 | NT                                                  | NT                                            |

**Key:** Detection method: C//P/M: Culture / PCR / Molecular typing

NT: Not tested

NA: Not available (tested but result not published on the article)

ND: Not detected

NR: Not reported in detail

CHL: Chloramphenicol; CLI: Clindamycin; CIP: Ciprofloxacin; ERY: Erythromycin; FOX: Cefoxitin; GEN: Gentamycin; KAN: Kanamycin; LEV: Levofloxacin; LZD: Linezolid; MUP: Mupirocin; OXA: Oxacillin; PEN: Penicillin; STR: Streptomycin; RIF: Rifampicin, SXT: Trimethoprim/sulfamethoxazole; TET: Tetracycline.

<sup>a</sup> = studies on more than one animal group.

**Table S2.** Molecular typing reports of *S. aureus* isolated from the NTO cavities of various free-living wild animals.

| Reference                                          | Animal Species (Description) (country)         | Sample size | No. of <i>S. aureus</i> | No. of MRSA | No. <i>mecA</i> -MRSA | No. <i>mecC</i> MRSA | <i>spa</i> types of MRSA <sup>a</sup> | ST of MRSA (number)             | CC of MRSA <sup>a</sup> (number) | <i>spa</i> types of MSSA                                                                                                                                      | ST of MSSA <sup>a</sup> (number)                                                  | CC of MSSA (number)                               |
|----------------------------------------------------|------------------------------------------------|-------------|-------------------------|-------------|-----------------------|----------------------|---------------------------------------|---------------------------------|----------------------------------|---------------------------------------------------------------------------------------------------------------------------------------------------------------|-----------------------------------------------------------------------------------|---------------------------------------------------|
| <b>Wild Mammals (WM excluding NHP and rodents)</b> |                                                |             |                         |             |                       |                      |                                       |                                 |                                  |                                                                                                                                                               |                                                                                   |                                                   |
| [5] <sup>a</sup>                                   | Iberian ibex, red deer, and wild boars (Spain) | 1120        | 188                     | 0           | 0                     | 0                    | NT                                    | NT                              | NT                               | t034 (2), t571 (1), t7304 (2), t002 (4), t1736 (3), t528 (16), t843 (2), t1535 (1), t098 (2), t127 (5), t607 (2), t1407 (2), t2601(1), t11223 (1), t6220 (1), | ST398 (3), ST130 (3), ST133 (2), ST5 (4)                                          | NT                                                |
| [18]                                               | Wild Boars (Portugal)                          | 45          | 15                      | 1           | 1                     | 0                    | t899                                  | ST398                           | NT                               | t1533, t3750, t286, t14312, t14311, t10668, t3583, t3750, t11230, t10712, t11230, t10712                                                                      | ST1 (2), ST3223 (4), ST3222, ST3220, ST2328 (2), ST133                            | NT                                                |
| [19]                                               | Red Deers (Spain)                              | 65          | 16                      | 11          | 0                     | 11                   | t843 (4), t1535 (7)                   | ST1945 (11)                     | CC130 (11)                       | t2420 (5)                                                                                                                                                     | ST133 (5)                                                                         | CC133 (5)                                         |
| [21] <sup>a</sup>                                  | Wild mammals (Spain)                           | 2506        | NR                      | 4           | 4                     | 0                    | t011 (2), t1451 (1), t127 (1)         | ST398 (3) ST1 (1)               | CC398 (3) CC1 (1)                | NT                                                                                                                                                            | NT                                                                                | NT                                                |
| [23]                                               | Wild mammals (Spain)                           | 103         | 23                      | 4           | 1                     | 3                    | t843 (3)                              | ST130 (3), ST1 (1)- <i>mecA</i> | CC130 (3), CC1 (1)               | t1535 (5), t7174, t1125, t6386 (2), t6056 (3)                                                                                                                 | ST130 (6), ST5 (2), ST133 (3)                                                     | CC130 (6), CC5 (2), CC425 (2), CC133 (3)          |
| [25]                                               | Wild boar (Spain)                              | 371         | 51                      | 1           | 1                     | 0                    | t011 (1)                              | ST398                           | CC398                            | t3750 (13), t16741, t3583 (5), t742 (1), t11232 (3), t6292 (1), t11212 (2), t127 (3), t843 (2), t1094 (1), t12923 (1)                                         | ST2328(13), ST2328 (2), ST133 (5), ST425 (7), ST1 (3), ST130 (1), ST3224, ST5 (5) | CC425 (7), CC1 (3), CC133(15), CC130 (2), CC5 (5) |

|      |                                                                                 |     |    |    |   |    |                                                                |                            |                        |                                                                                                                      |                                                                                                  |           |
|------|---------------------------------------------------------------------------------|-----|----|----|---|----|----------------------------------------------------------------|----------------------------|------------------------|----------------------------------------------------------------------------------------------------------------------|--------------------------------------------------------------------------------------------------|-----------|
| [29] | Rabbit and hare (Spain)                                                         | 363 | 71 | 34 | 0 | 34 | NT                                                             | ST1945 (33),<br>ST5823 (1) | CC130 (34)             | NT                                                                                                                   | NT                                                                                               | NT        |
| [30] | Wild Ungulate (Spain)                                                           | 137 | 0  | 0  | 0 | 0  | NT                                                             | NT                         | NT                     | NT                                                                                                                   | NT                                                                                               | NT        |
| [31] | European brown hare, European otter, European hedgehog, Eurasian lynx (Germany) | 40  | 5  | 5  | 0 | 5  | t843 (2),<br>t10513 (1),<br>t3256 (1),<br>t4335 (1)            | ST130 (4),<br>ST2620 (1)   | NT                     | NT                                                                                                                   | NT                                                                                               | NT        |
| [32] | Wild rabbits (Portugal)                                                         | 77  | 4  | 0  | 0 | 0  | NT                                                             | NT                         | NT                     | t272 (4)                                                                                                             | ST121 (4)                                                                                        | CC121 (4) |
| [33] | Wild boar (Germany)                                                             | 111 | 41 | 0  | 0 | 0  | NT                                                             | NT                         | NT                     | t127 (15), t571, t742, t3369, t6902 t7674, t10885, t12042, t14149, t14999, t15001, t15002, t14149, t021, t1181, t091 | ST1 (15), ST7, ST30, ST133, ST425 (10), ST804, ST890, ST3237, ST3238, ST3255, ST3369, ST804, ST7 | NT        |
| [34] | Wild Hedgehog (Sweden)                                                          | 55  | NR | 35 | 0 | 35 | t843 (17), t10751, t978 (3), t9111 (3), t15312 (4), t3391 (5), | NT                         | CC130 (20), CC2361(15) | NT                                                                                                                   | NT                                                                                               | NT        |

|                                 |                                             |     |    |   |   |   |                           |                     |           |                                 |                                 |                        |
|---------------------------------|---------------------------------------------|-----|----|---|---|---|---------------------------|---------------------|-----------|---------------------------------|---------------------------------|------------------------|
|                                 |                                             |     |    |   |   |   | t10893 (1),<br>t11015 (1) |                     |           |                                 |                                 |                        |
| [35]                            | Bats (Gabon and Cote d'Ivoire)              | 133 | 4  | 0 | 0 | 0 | 0                         | NT                  | NT        | t15196, t15197 (3)              | ST2984, ST3259, ST3301, ST3302  | NT                     |
| [39]a                           | Shrews (China)                              | 185 | 14 | 1 | 0 | 0 | t15965                    | ST3323              | NT        | NT                              | NT                              | NT                     |
| <b>Non-human primates (NHP)</b> |                                             |     |    |   |   |   |                           |                     |           |                                 |                                 |                        |
| [43]                            | Free living chimpanzees (Zambia and Uganda) | 62  | 36 | 0 | 0 | 0 | NT                        | NT                  | NT        | t1247 (16), t934 (9), t7723 (4) | ST2168 (16), ST15 (4), ST80 (9) | NT                     |
| [45]                            | Apes and Lemur (Madagascar)                 | 19  | 7  | 0 | 0 | 0 | NT                        | NT                  | NT        | t10694 (4), t127 (1), t189 (2)  | ST1 (4), ST182, ST188 (2)       | NT                     |
| [46]                            | Non-human Primates (Gabon, Cote d'Ivoire)   | 95  | 58 | 0 | 0 | 0 | NT                        | NT                  | NT        | t127, t6533                     | ST1, ST9, ST15, ST36 and ST152, | CC9, CC15, CC80, CC601 |
| [47]                            | Primates (Nepal)                            | 59  | 25 | 4 | 4 | 0 | NT                        | ST22 (3), ST239 (1) | NT        | NT                              | NT                              | NT                     |
| <b>Wild Birds (WB)</b>          |                                             |     |    |   |   |   |                           |                     |           |                                 |                                 |                        |
| [5] <sup>a</sup>                | Eurasian griffon vulture (Spain)            | 40  | 2  | 0 | 0 | 0 | NT                        | NT                  | NT        | t7304 (2)                       | ST133 (2)                       | NT                     |
| [21] <sup>a</sup>               | Eurasian Griffon vulture (Spain)            | 40  | NR | 2 | 2 | 0 | t011 (2)                  | ST398 (2)           | CC398 (2) | NT                              | NT                              | NT                     |

|                   |                                                    |     |    |    |   |    |                                |                                                           |                               |                                                                              |                                                          |                                |
|-------------------|----------------------------------------------------|-----|----|----|---|----|--------------------------------|-----------------------------------------------------------|-------------------------------|------------------------------------------------------------------------------|----------------------------------------------------------|--------------------------------|
| [24]              | Wild birds (USA)                                   | 114 | 10 | 3  | 2 | 0  | t002, t008 (2)                 | ST5 (1), ST8 (2)                                          | NT                            | t4735, t4368, t2603, t4634, t1059, t1166, t094                               | ST1959, ST2018                                           | NT                             |
| [36]              | Birds of prey (Buzzard) (Portugal)                 | 16  | 1  | 0  | 0 | 0  | NT                             | NT                                                        | NT                            | NT                                                                           | ST30                                                     | CC30                           |
| [37]              | Stork (Spain)                                      | 92  | 32 | 3  | 2 | 1  | t843 (1), t011 (2)             | ST3061 (1), ST398 (2)                                     | CC130 (1), CC398 (2)          | t571 (5), t6606 (3), t3625 (1)                                               | ST5 (12), ST398 (7), ST133 (5), ST2377 (1)               | CC5 (12), CC398 (9), CC133 (5) |
| [38]              | Cinereous vulture and Magpie (Spain)               | 324 | 15 | 13 | 1 | 12 | t843 (11), t1535 (1), t011 (1) | ST1583 (3), ST398 (1), ST1945 (7), ST1581 (1), ST1571 (1) | CC130 (12), CC398 (1)         | t267 (1), t5998 (1)                                                          | ST97 (1), ST425 (1)                                      | CC97 (1), CC425                |
| Wild Rodents (WR) |                                                    |     |    |    |   |    |                                |                                                           |                               |                                                                              |                                                          |                                |
| [12]              | Free-Living wild rats (Germany and Czech Republic) | 145 | 37 | 2  | 1 | 1  | t843 (1), t685 (1)             | NT                                                        | CC130 (1), CC30 (1)           | t1048 (4), t208 (2), t14284 (12), t843 (6), t1535 (4), t3256 (6), t19038 (1) | NT                                                       | CC130 (20), CC49, (15)         |
| [17]              | Wild Rodents (Portugal)                            | 204 | 38 | 6  | 3 | 3  | t1535 (3), t747 (2) t018 (1)   | ST1945 (3), ST22 (2), ST36 (1)                            | CC130 (3), CC22 (2), CC36 (1) | t1451 (5), t571 (1), t843 (7), t3256 (2), t516 (7)                           | ST398 (4), ST5926 (2), ST130 (7), ST1245 (2), ST1094 (7) | CC398 (6), CC130 (9)           |



|                   |                                                     |     |    |    |    |   |                                                                                       |                                                                           |                                        |                                                                                  |                                |                                       |
|-------------------|-----------------------------------------------------|-----|----|----|----|---|---------------------------------------------------------------------------------------|---------------------------------------------------------------------------|----------------------------------------|----------------------------------------------------------------------------------|--------------------------------|---------------------------------------|
| [22]              | Wild rodents and shrews (Germany, Czech and France) | 295 | 45 | 1  | 0  | 1 | t843 (1)                                                                              | NT                                                                        | CC130 (1)                              | t208 (11), t841 (1), t1736, t1773, t2311, t3058, t3830, t4189 (6), t9909, t15027 | ST49 (17), ST88 (1), ST130 (1) | CC49 (17), CC88 (1), CC195, CC130 (1) |
| [39] <sup>a</sup> | Rodents (China)                                     | 212 | 87 | 11 | 11 | 0 | <b>t034</b> (1), <b>t011</b> (1), <b>t4552</b> (1), <b>t2582</b> (1), <b>t558</b> (1) | ST398 (4), ST1243 (2), ST59 (1), ST45 (1), ST1232 (1), ST1 (1), ST338 (1) | CC398 (5), CC59 (4), CC5 (1), CC45 (1) | NT                                                                               | NT                             | NT                                    |

**NB:**

<sup>a</sup>In bold are indicated the *spa*-types associated to *S. aureus* isolates of the lineage CC398; in gray shadow are indicated the *spa*-types or CC types of *mecC*-MRSA isolates.

**Key:**

NT: not tested.

ST: Sequence Type.

CC: Clonal Complex

<sup>a</sup> = studies on more than one animal group.

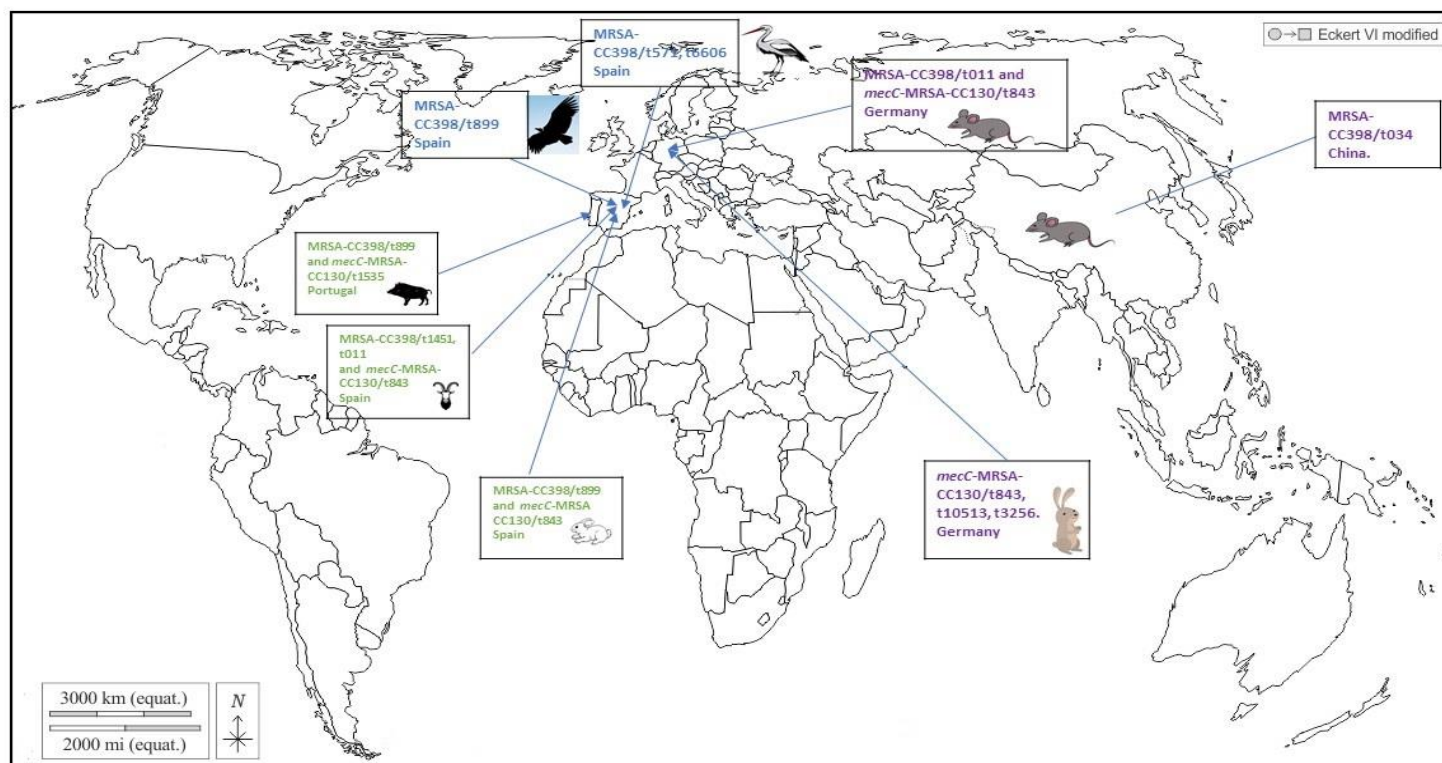

**Figure S1.** Geographic distribution of MRSA-CC398 and *mecC*-MRSA isolates detected in NTO cavities of wild animals (data obtained from tables 2 and 3).

**Note:** MRSA-CC398 and *mecC*-MRSA isolates were only reported in Europe and China (Raafat *et al* [12], Sousa *et al* [18], Porrero *et al* [5, 21], Ruiz-Ripa *et al* [23], Moreno-Grúa *et al* [29], Loncaric *et al* [31], Ruiz-Ripa *et al* [38], Ge *et al* [39]).
